# Supplementary material for: Nanoengineering TiO2 for evaluating performance in dye sensitized solar cells with natural dyes
Source: Royal Society of Chemistry journal article supplement (doi:10.1039/d3ra02927a), 2023-01-01
Supplement: d3ra02927a1.pdf [file d3ra02927a1.pdf]

1  
2  
3  
4  
5  
6  
7  
8  
9  
10  
11  
12  
13  
14  
15  
16  
17  
18  
19  
20  
21  
22  
23

ESI

**Nanoengineering TiO<sub>2</sub> for evaluating performance in dye sensitized solar cells with natural dyes**

Mohd Jahir Khan<sup>1</sup>, Ankesh Ahirwar<sup>1</sup>, Vandana Sirotiya<sup>1</sup>, Anshuman Rai<sup>2,3</sup>, Sunita Varjani<sup>4,5</sup>  
and Vandana Vinayak<sup>1\*</sup>

<sup>1</sup>Diatom Nanoengineering and Metabolism Laboratory (DNM), School of Applied science,  
Dr. Harisingh Gour Central University, Sagar (MP) 470003, India.

<sup>2</sup>School of Engineering, Department of Biotechnology, Maharishi Markendeshwar University  
Ambala, Haryana, 133203, India

<sup>3</sup>State Forensic Science laboratory, Haryana, Madhuban, 132037, India

<sup>4</sup>School of Energy and Environment, City University of Hong Kong, Tat Chee Avenue,  
Kowloon, 999077, Hong Kong

<sup>5</sup>Sustainability Cluster, School of Engineering, University of Petroleum and Energy Studies,  
Dehradun-248 007, Uttarakhand, India

\*Corresponding author: [kapilvinayak@gmail.com](mailto:kapilvinayak@gmail.com)

24

25

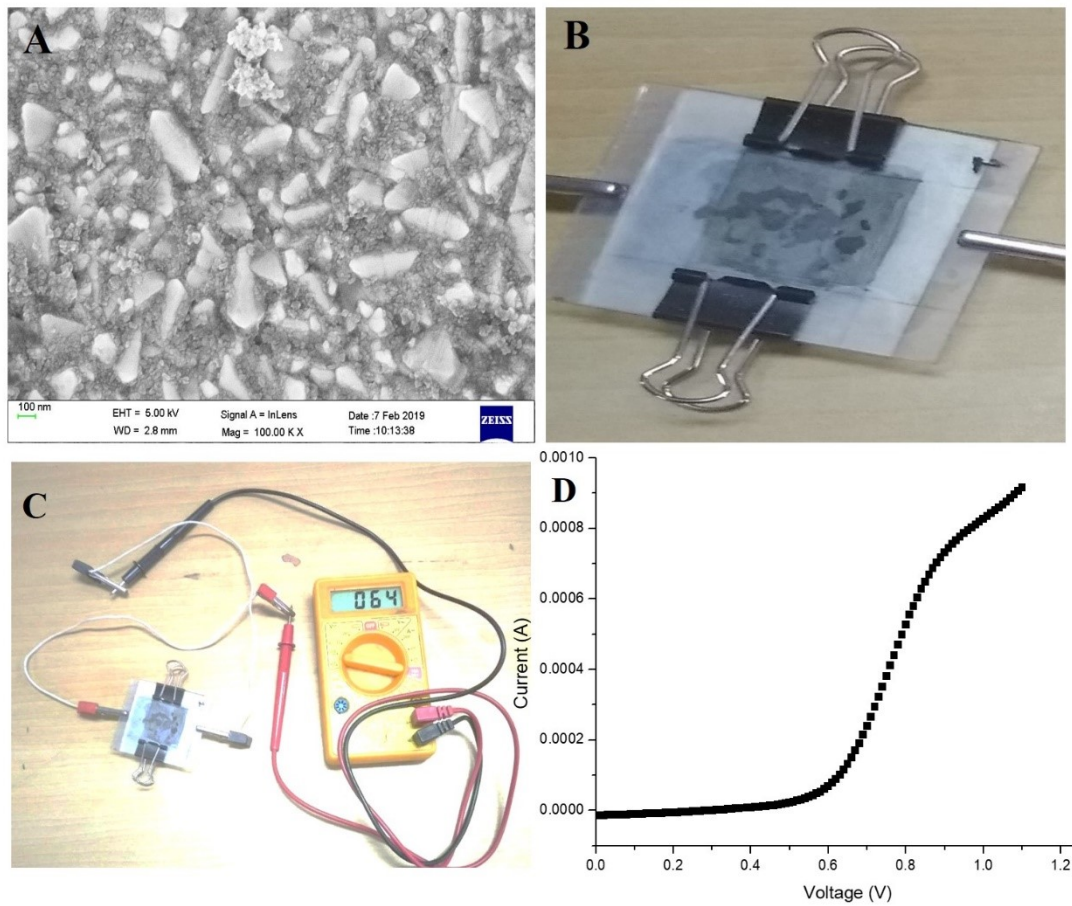

26

27 **ESI Figure 1. A)** Titania anatase rutile coat on FTO anode plate; **B)** Fabricated *DsTnas*-  
28 DSSC; **C)** *DsTnas*-DSSC with multimeter set up and **D)** I-V curve of *DsTnas*-DSSC with  
29 ruthenium dye as control

30

31

32

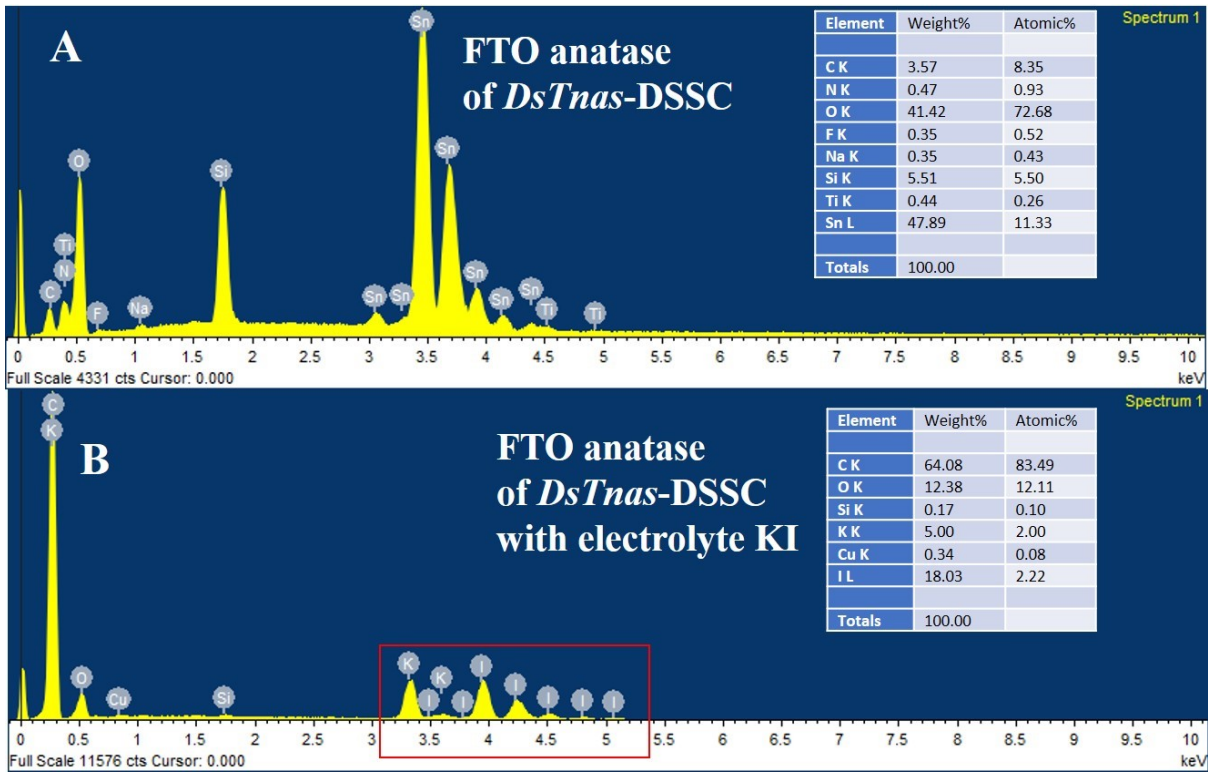

33

34 **ESI Figure 2** Scanning electron microscopy-energy dispersive X-ray (SEM-EDX) analysis  
 35 of elemental composition of **A**) FTO anatase of *DsTnas*-DSSC without electrolyte and **B**)  
 36 FTO anatase of *DsTnas*-DSSC with KI electrolyte (B).

37

38

39

40

41

42

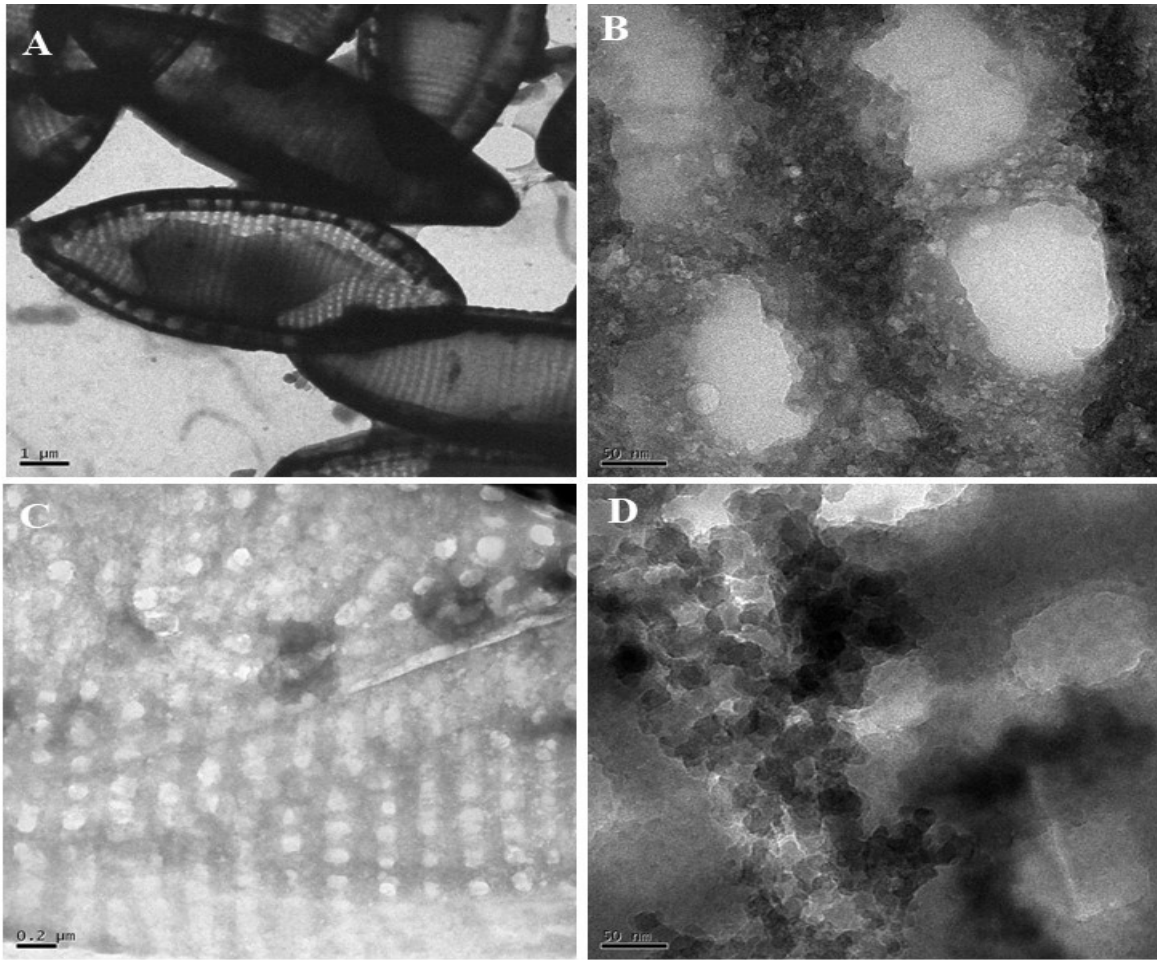

43

44 **ESI Figure 3.** TEM images **A)** Undoped diatom and **B)** Enlarged empty pore structure of  
45 diatom frustule; **C)** Diatom rich Si doped with TiO<sub>2</sub> NP and **D)** Enlarged view of TiO<sub>2</sub> NP  
46 doped in diatom pore.

47

48

49

50

51

52

53

54

55

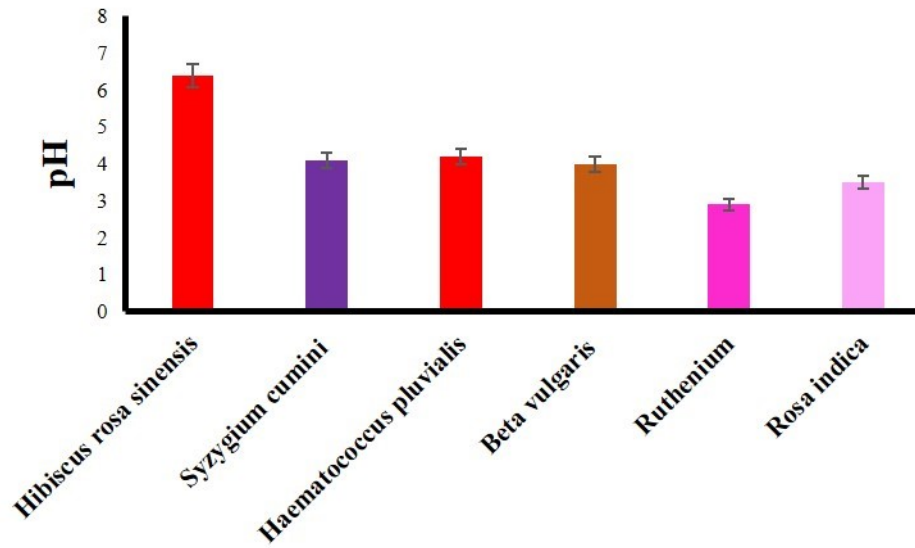

56

57 **ESI Figure 4.** pH of different natural dyes **A)** *Hibiscus rosa sinensis* **B)** *Syzygium cumini*; **C)**

58 *Haematococcus pluvialis*; **D)** *Beta vulgaris*; **E)** Ruthenium and **F)** *Rosa indica*

59

60

61

62

63

64

65

66

67

68

69

70

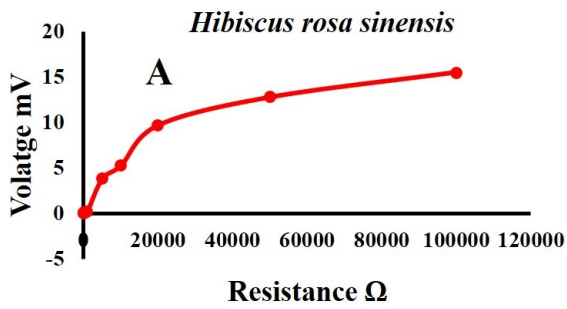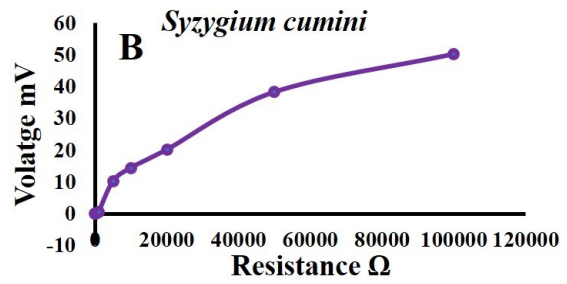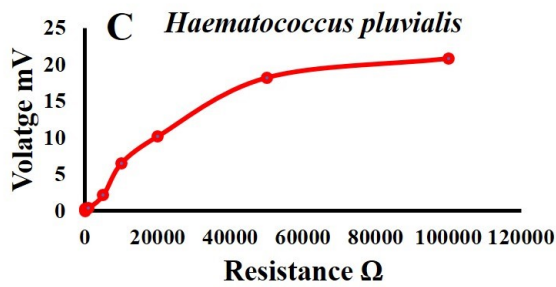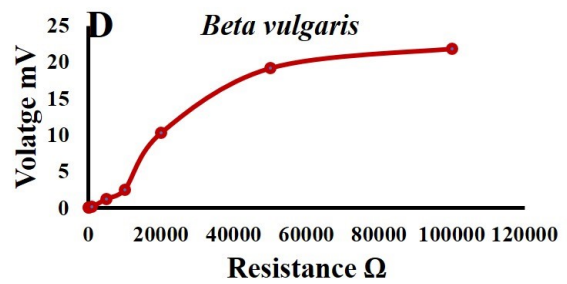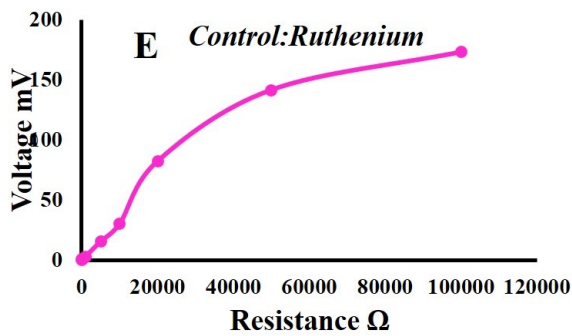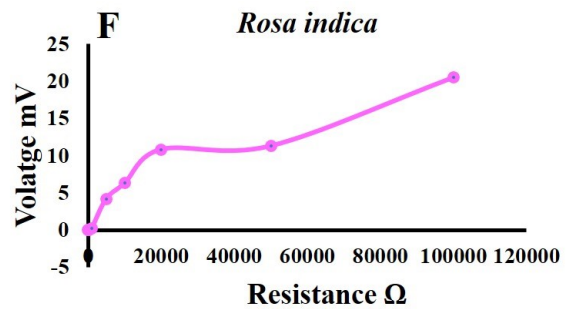

71

72 **ESI Figure 5.** Voltage (mV) obtained in *DsTnas*-DSSCs at resistance 20K to 120K using **A)**  
73 Ruthenium; **B)** *Syzygium cumini*; **C)** *Beta vulgaris*; **D)** *Haematococcus pluvialis*; **E)** *Rosa*  
74 *indica* and **F)** *Hibiscus rosa*

75

76

77

78

79

80

81

82

83

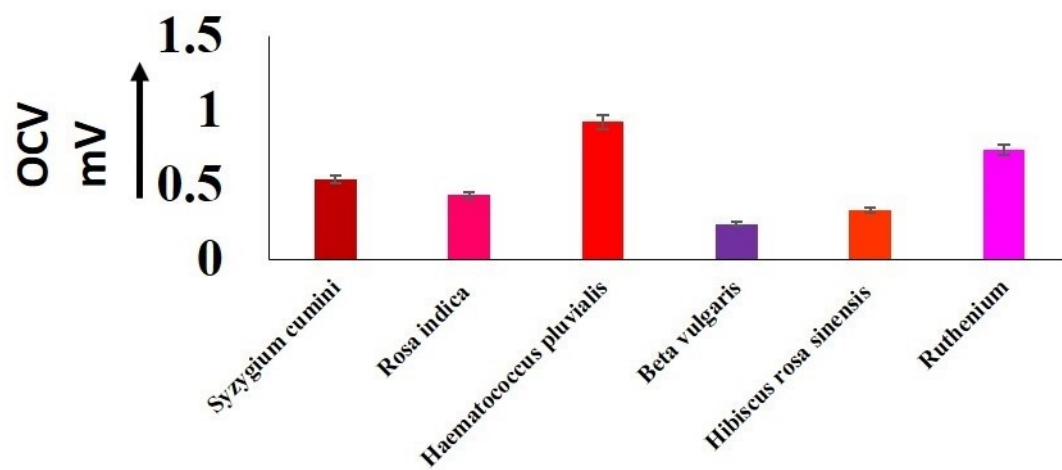

84

85 ESI Figure 6. Open circuit voltage of *DsTnas*-DSSCs with natural dyes
